1 **Glucose dynamics during ozone exposure measured using radiotelemetry: Stress drivers**  
2 **and human concordance**

3  
4 Andres R. Henriquez<sup>\*a1</sup>, Samantha J. Snow<sup>\*b2</sup>, John S. House<sup>c</sup>, Alison A. Motsinger-Reif<sup>c</sup>,  
5 Cavin K. Ward-Caviness<sup>b</sup>, Mette C. Schladweiler<sup>b</sup>, Devin I. Alewel<sup>a</sup>, Colette N. Miller<sup>b</sup>, Aimen K.  
6 Farraj<sup>b</sup>, Mehdi S Hazari<sup>b</sup>, Rachel Grindstaff<sup>b</sup>, David Diaz-Sanchez<sup>b</sup>, Andrew J Ghio<sup>b</sup>, and Urmila  
7 P. Kodavanti<sup>b\*\*</sup>

8  
9  
10 <sup>a</sup>Oak Ridge Institute for Science and Education Research Participation Program, U.S.  
11 Environmental Protection Agency, Research Triangle Park, NC 27711, USA.

12 <sup>b</sup>Center for Public Health and Environmental Assessment, U.S. Environmental Protection  
13 Agency, Research Triangle Park, NC 27711 , USA.

14 <sup>c</sup>Division of Intramural Research, National Institute of Environmental Health Sciences, National  
15 Institutes of Health, Department of Health and Human Services, Research Triangle Park, NC,  
16 27709, USA.

17 <sup>\*</sup>A.R.H. and S.J.S. contributed equally to this work.

18 <sup>1</sup>Current address: Environmental Health Science and Research Bureau, Health Canada,  
19 Ottawa, Ontario, Canada, K1A 0K9

20 <sup>2</sup>Current address: ICF International Inc., Durham, North Carolina 27713, USA.

21  
22 **Running Head:** Dynamic of ozone-induced stress response

23  
24  
25 **\*\*Corresponding Author**

26 Urmila P. Kodavanti, PhD, MSc, DABT  
27 PHITD, CPHEA, US EPA; MD B105-02  
28 Research Triangle Park, NC 27711  
29 [kodavanti.urmila@epa.gov](mailto:kodavanti.urmila@epa.gov)  
30 Phone: 919 541-4963; Fax: 919-541-0026

31  
32 **Keywords:** stress response, neuroendocrine, ozone, glucocorticoids, catecholamines,  
33 metabolic response, real-time glucose radiotelemetry, pituitary hormones, adrenalectomy

34

35

36 **Abstract**

37 **Background.** Stress-related neurobehavioral and metabolic disorders are associated with  
38 altered circulating adrenal-derived hormones and hyperglycemia. Temporal assessment of  
39 glucose and these hormones is critical for insights on an individual's health. **Objectives.** Here  
40 we use implantable-telemetry in rats to assess real-time changes in circulating glucose during  
41 and after exposure to the air pollutant ozone, and link responses to circulating neuroendocrine  
42 stress and metabolic hormones. We also proposed to compare rodent glucose and  
43 corticosterone (cortisol in humans) responses to humans exposed to ozone. **Methods.** First,  
44 using a cross-over design, we monitored glucose levels during single or repeated ozone  
45 exposures (0.0, 0.2, 0.4 and 0.8-ppm) and non-exposure periods in male Wistar-Kyoto-rats  
46 implanted with glucose-telemeters. A second cohort of un-implanted rats was exposed to ozone  
47 (0.0, 0.4 or 0.8-ppm) for 30-min, 1-hour, 2-hour, or 4-hour with hormones measured immediately  
48 after exposure. Then we assessed glucose metabolism in sham and adrenalectomized rats with  
49 or without pharmacological interventions of adrenergic and glucocorticoid receptors. Finally, we  
50 assessed glucose and cortisol in serum samples from a clinical study involving exposure of  
51 human volunteers to air or 0.3 ppm ozone. **Results.** Ozone (0.8-ppm) caused hyperglycemia  
52 and hypothermia beginning 90-min into exposure, with reversal of effects 4-6 hours post-  
53 exposure. Glucose monitoring during four daily 4-hour ozone exposures revealed duration of  
54 hyperglycemia, adaptation, and diurnal variations. Ozone-induced hyperglycemia was preceded  
55 by increased adrenocorticotrophic hormone, corticosterone, and epinephrine, but depletion of  
56 thyroid-stimulating, prolactin, and luteinizing hormones. Hyperglycemia was inhibited in rats  
57 that are adrenalectomized and/or treated with glucocorticoid inhibitor. There was coherence  
58 among rats and humans in ozone-induced corticosterone/cortisol increases. **Discussion.** We  
59 demonstrate for the first time the temporality of neuroendocrine-stress-mediated biological  
60 sequelae responsible for ozone-induced metabolic dysfunction as exposure occurs. Real-time  
61 glucose monitoring with stress hormones assessment may be useful in identifying interactions  
62 among pollutants and stress-related illnesses.

63  
64  
65  
66  
67  
68  
69

70

## 71 INTRODUCTION

72 Air pollution, climate change, the epidemic of COVID-19, social inequalities, unhealthy  
73 dietary habits, and sedentary lifestyle are likely to further escalate mental health crises and  
74 metabolic syndrome world-wide. Among many environmental risk factors, air pollution accounts  
75 for nearly 70% of all environmental causes of human mortality,<sup>1</sup> and is linked to neurobehavioral  
76 and metabolic diseases. Increased incidence of Alzheimer's disease,<sup>2,3</sup> late life cognitive  
77 decline,<sup>4</sup> anxiety, and even criminality have been associated with the exposure to air pollutants.<sup>5</sup>  
78 Moreover, associations have been found between air pollution and concurrent exacerbation of  
79 diabetes and Alzheimer's disease.<sup>4</sup> Those with Alzheimer's and Parkinson's disease also often  
80 suffer from diabetes suggesting potential neural contribution to peripheral diseases and  
81 mechanistic linkages.<sup>6,7</sup>

82 With the emerging link between air pollution, stress, and neuro-cognition,<sup>5,8</sup> the role of  
83 neuroendocrine system is inevitable. Psychosocial and environmental stressors are the primary  
84 contributors to chronic disease susceptibility. The central neuroendocrine system responds to  
85 stress-induced autonomic sensory activation and orchestrates a peripheral stress response,  
86 while initiating two survival processes, namely metabolism and immune surveillance in an  
87 organ-specific manner.<sup>9</sup> In addition to sympathetic neurons innervating the majority of peripheral  
88 organs, sympathetic-adrenal-medullary (SAM) and hypothalamic-pituitary-adrenal (HPA) axes-  
89 mediated release of catecholamines and corticosteroids produce peripheral cellular response to  
90 stress.<sup>9</sup> These are the same hormones that regulate stress adaptation through their action on  
91 the CNS centers via feedback controls.<sup>10</sup> Chronic alterations in the levels of circulating stress  
92 hormones, especially glucocorticoids have been linked to psychological disorders and  
93 cardiometabolic diseases.<sup>11</sup> Release of centrally- mediated stress hormones and peripheral  
94 responses to stress are plastic, and are temporally and spatially regulated, such that no adverse  
95 effects persist upon discontinuation of stress.<sup>10</sup> However, when the neuroendocrine system is

96 impaired or overactive, disease may ensue.<sup>12</sup> Thus, the temporal assessment of the stress  
97 dynamics is critical to understanding an individual's susceptibility to environmental insults.

98         Monitoring of stress response through real-time assessment of circulating cortisol and  
99 glucose in humans is not common. However, in children recovering from surgery, blood glucose  
100 and cortisol are often measured to assess stress.<sup>13</sup> Individuals with type 2 diabetes, when  
101 subjected to acute moderate psychological stress (Trier Social Stress Test), have spikes in  
102 blood glucose as determined using real-time glucose monitors.<sup>14</sup> Real-time glucose monitoring  
103 sensors, which have been developed in early 1990's, are now applied more widely for  
104 diabetics.<sup>15</sup> In humans, continuous monitoring of glucose using non-invasive sensor-based  
105 electromagnetic coupling is already gaining popularity,<sup>16</sup> providing the opportunity to use such  
106 monitors in detecting environmental stressor effects such as air pollutants. Very recently, a  
107 wireless graphene-based sweat stress sensing mHealth system has been developed for  
108 dynamic and non-invasive assessment of cortisol in sweat.<sup>17</sup> The use of new techniques for  
109 dynamic stress assessment will be valuable for determining the health impact of stressors on  
110 the body. In particular, this approach in air pollution health effects studies could allow evaluation  
111 of short and long-term effects on health and provide diagnostic and mechanistic insights.

112         We have shown that acute single exposure to ozone induces a classical stress response  
113 associated with increases in circulating catecholamines, glucocorticoids and glucose.<sup>18,19</sup>  
114 However, the neuroendocrine stress response is temporal and reversible in healthy individuals.  
115 In order to link ozone-induced alterations in metabolic processes, and neuroendocrine stress, it  
116 is critical to determine the dynamicity of peripheral metabolic effects and how that relates to  
117 neuroendocrine changes. The purpose of our study was to determine the temporality of glucose  
118 changes during and after ozone exposure in a rat model using implantable radiotelemetry,  
119 which has not been previously employed for experimental assessment of air pollution effects.  
120 We hypothesized that increased glucose levels during ozone exposure will be secondary to  
121 ozone-induced increases in stress hormones. Real-time glucose measures were coupled with

122 separate measures of stress hormones as well as mechanistic studies to assess the role of  
123 stress responses in ozone-induced glucose fluctuations. Moreover, to establish coherence with  
124 human responses, we assessed the impacts of ozone exposure on glucose and cortisol levels  
125 in young healthy volunteers.

126

## 127 **Materials and Methods**

### 128 ***Animals***

129 All male Wistar Koto rats 10-12 weeks were purchased from Charles River Laboratories  
130 Inc., Raleigh, NC and maintained in our Association for Assessment and Accreditation of  
131 Laboratory Animal Care-approved EPA animal facility. Animals were pair housed in  
132 polycarbonate cages with beta chips bedding and EnviroDry enrichment material, except when  
133 stated. Animal rooms were maintained on a 12 hr light/dark cycle (6AM-6PM) at ~22°C and 50%  
134 relative humidity. They were provided free access to Purina (5001) pellet rat chow (Brentwood,  
135 MO) and water ad libitum, unless stated during experimental procedures. Animal protocols  
136 were approved by the EPA's Institutional Animal Care and Use Committee prior to starting  
137 studies and we followed National Institutes of Health guide for the care and use rats (NIH  
138 Publications No. 8023).

### 139 ***Glucose telemetry surgeries***

140 Eight male Wistar-Kyoto (WKY) rats (at 13 weeks of age) were implanted with DSI  
141 glucose telemeters (HD-XG, St. Paul, MN) using aseptic techniques (Figure S1, Table S1).  
142 Anesthesia was induced by vaporized isoflurane inhalation (4%, 1-2 LPM of O<sub>2</sub>) and maintained  
143 during the surgery (2-3%, 1-2 LPM of O<sub>2</sub>). Once anesthetized, analgesic meloxicam (2 mg/kg, in  
144 saline s.c.) and artificial tear ointment were provided before surgery. Anesthesia was  
145 continuously checked by toe pinch. A trained surgeon implanted the sensor in the descending  
146 abdominal aorta and the transmitter subcutaneously. The blood glucose (Nova Biomedical,

147 Waltham, MA) sensor uses glucose oxidase to convert glucose and oxygen into gluconic acid  
148 and hydrogen peroxide. The amount of hydrogen peroxide, which is proportional to the amount  
149 of glucose, reacts with a noble metal electrode to transfer electrons and create a current.<sup>20</sup> The  
150 glucose telemetry system includes a reference electrode with an electronics/battery (Ag/AgCl)  
151 with a separate lead. This was sutured to the inner abdominal wall module into the midline  
152 abdominal muscle (Figure S1). During abdominal wall closure, the abdominal cavity was  
153 washed with saline (15 mL/kg) and rats were given bupivacaine (1 mg/kg, in saline s.c.).  
154 Recovery took place on heating pads under close observation of distress signals and once  
155 awake the rats were placed into their home cages and administered with meloxicam (1 mg/kg,  
156 in saline s.c.) 24, 48 and 72 hours after the surgery.

### 157 **Blood glucose concentration data acquisition**

158 After surgery, rats were individually housed in cages with pine shavings bedding. Rats  
159 were provided with water and powdered as well as pelleted standard Purina (5001) rat chow  
160 (Brentwood, MO) *ad libitum*. Blood glucose levels, core body temperature, and activity level  
161 measurements were sent via radio signals and collected using receivers placed under each  
162 cage. The recording for each rat began soon after the surgery and continued until the end of the  
163 experiment. The cages were placed over receivers (RPC-1, DSI) and data were simultaneously  
164 collected in a computer placed in an adjacent isolated room (Figure S1). For verification and  
165 calibration purposes, single point calibrations were carried out. While glucose monitoring was  
166 going on, glucose tolerance test was performed. Food was removed from cages 6 hours in  
167 advance and then baseline glucose readings were obtained through tail prick using a  
168 glucometer (Nova Biomedical StatStrip® Xpress, DSI). Rats were then injected with glucose  
169 (20% pharmaceutical grade D-glucose; Covetrus, Dublin, OH; 2 g/kg/10mL, i.p.) and data were  
170 collected using glucometer via a tail prick every 30 minutes for 2 hours. These readings were  
171 then correlated with glucose measurements done using radio telemetry. Interpolation of glucose  
172 levels and electric current detected by the sensor was corrected for differences in body

173 temperature versus room temperature, merged and analyzed for each animal with a resolution  
174 of 1 minute using Dataquest® software acquisition system (DSI).

### 175 ***Ozone exposure***

176 Two weeks after surgery, rats were exposed (n=1-2 each) whole body to ozone (0.2, 0.8  
177 or 0.4 ppm) or filtered air (0.0 ppm) in Rochester style “Hinnners” chambers, using a crossover  
178 exposure design (Table S1). Briefly, rats for first exposure were randomized in pairs for 0.0  
179 (clean air), 0.2, 0.4 or 0.8 ppm of ozone exposure for 4 hrs. A different set of receivers were  
180 placed in each ozone exposure chambers to acquire data while animals were being exposed.  
181 After 1 week of washout period, these exposures were repeated but changing the targeted  
182 ozone exposure concentration for each pair of rats. This experiment was repeated a total of four  
183 times to cover all the targeted ozone concentrations for all eight rats. Rat #6 was discarded from  
184 the experiment due to mal function of the sensor and/or transmitter. Ozone was generated from  
185 oxygen using a silent arc discharge generator (OREC, Phoenix, Arizona) and measured using  
186 mass flow controllers (Coastal Instruments Inc., Burgaw, North Carolina) as we have reported in  
187 our prior studies.<sup>18,21</sup> The target ozone concentrations were recorded by photometric analyzers  
188 (API Model 400, Teledyne, San Diego, California). Mean chamber temperature, relative  
189 humidity, and air flow were recorded hourly.

### 190 ***Glucose/temperature telemetry data acquisition and analysis***

191 After 4-5 days of surgery and at regular interval the device was calibrated against  
192 intraperitoneal glucose tolerance test (GTT) performed as indicated below based on the protocol  
193 explained by Brockway and collaborators at Data Sciences Inc.<sup>20</sup> As recommended, single-point  
194 calibrations were done twice weekly throughout the study. Dataquest® acquisition system (DSI)  
195 included telemetry signal receiver for each animal, a data matrix for analyzing receiver signals  
196 and a computer. This telemetry devices allowed continuous sampling of 8 animals that are  
197 individually housed in cages with receivers right underneath. To avoid signal mixing between

198 two animals the animal racks were equipped with stainless steel dividers. The software allowed  
199 us to configure the devices and the protocol for continuous data collection as described  
200 previously.<sup>20</sup> Glucose and temperature data with a resolution of 1 minute was averaged to  
201 prepare graphs. All exposures were aligned to minute 0 when 80% of target ozone  
202 concentration was reached. For each minute glucose levels and temperature was averaged  
203 from exposed rats (0.0 ppm, n=6; 0.2 ppm, n=5; 0.4 ppm, n=5; 0.8 ppm, n=5). Based on the  
204 animal position in the exposure chamber, occasionally data were not acquired and therefore for  
205 telemetry studies number of observations varied between 3-7. Multiple hours of data after the  
206 exposure stopped were included to follow days of recovery during non-exposure periods.

### 207 ***Time course assessment of hormonal response in rats***

208 A separate cohort of healthy male 12-13-week-old rats was exposed to clean air or  
209 ozone at two concentrations (0.4 and 0.8 ppm) for 30 min, 1 hr, 2 hr or 4 hr (n=6-8 per group)  
210 and necropsied immediately after each time point (Figure 2) to collect blood samples as  
211 described below. We have shown in our previous studies that ~10% of male WKY rats display  
212 spontaneous cardiac hypertrophy,<sup>22</sup> therefore at necropsy heart to body weight ratios were  
213 calculated for all animals and those with 20% or greater increases were removed from data  
214 analysis as we have done for many studies.

### 215 ***Adrenalectomy and sham surgeries***

216 Rats (12–13 weeks old) underwent total bilateral adrenalectomy (AD) or control sham  
217 (SH) aseptic surgeries using protocols established at Charles River Laboratories and previously  
218 described in our recently published studies.<sup>23,24</sup> Briefly, rats were anesthetized with ketamine  
219 (25–50 mg/kg in saline, i.p.), and once anesthetized, injected with the analgesic buprenorphine  
220 (0.02 mg/kg/ml in saline: s.c.). During the surgery, anesthesia was maintained by nose-  
221 inhalation of vaporized isoflurane (~3%, 1-2 LPM of O<sub>2</sub>). Animal surgeons from Charles River  
222 Laboratories Inc performed the surgeries. Animals were placed in sternal recumbency and



223 dorsal incision was made. Adrenals from both sides were removed and the muscle layer was  
224 sutured to close the abdominal cavity. The surgical wound clips were used to clip the skin and  
225 close the wound. SH surgeries were performed using the same anesthesia and surgical  
226 approaches as AD except for the removal of adrenal glands. Rats were recovered on heating  
227 pads and assessed for signs of distress and pain. Once awake, meloxicam (0.2 mg/kg in saline;  
228 s.c.) and buprenorphine (0.02 mg/ml/kg in saline, s.c. every 8–12h for 2 times) was  
229 administered for analgesia. After the surgery, AD rats received water with 0.9% NaCl to  
230 maintain adequate salt-water balance in the absence of mineralocorticoids eliminated due to AD  
231 along with other adrenal-derived stress hormones. All animals were provided with powdered as  
232 well as pelleted food *ad libitum*. The rats were pair housed with Enviro Dry enrichment/nesting  
233 material and allowed to recover for 4–6 days prior to any drug treatment as reported in our  
234 previous companion paper.<sup>24</sup>

235 ***Clenbuterol (CLEN;  $\beta$ 2AR agonist) and dexamethasone (DEX; GR agonist) treatments and***  
236 ***ozone exposure***

237 As detailed in our recent publication,<sup>24</sup> SH and AD rats were randomized by body weight  
238 into four groups (vehicle: air, vehicle: ozone, CLEN+DEX: air, and CLEN+DEX: ozone) resulting  
239 in 8 total groups (n=8/group). The treatment protocol for CLEN and DEX has been explained in  
240 the published paper.<sup>24</sup> In brief, after 4-6 days of recovery from SH and AD, rats were treated  
241 with vehicles (saline 1 mL/kg as control for CLEN, i.p.) and corn oil (1 mL/kg as control for DEX,  
242 s.c.) or clenbuterol hydrochloride, a long acting  $\beta$ 2AR agonist (CLEN; 0.2 mg/kg in saline, i.p.)  
243 and GR agonist, dexamethasone (DEX; 2 mg/ml corn oil/kg, s.c.). Generally, CLEN injections  
244 were followed by DEX. The drug treatment began 1 day prior to start of ozone exposure and  
245 continued the day of air or ozone exposure in the morning at ~6am. These high doses were  
246 selected to restore the depleted activities of epinephrine and corticosterone in AD groups. CLEN  
247 and DEX doses are comparable to those used in other controlled experiments using rodents

248 and are sufficient to induce bronchodilation and immunosuppression, respectively.<sup>25,26</sup> Rats  
249 were exposed to air or 0.8 ppm ozone for 4 hours as described above, and glucose tolerance  
250 test (GTT) was performed immediately following exposure.

### 251 ***Ozone exposure in SH and AD rats treated with $\beta$ AR and GR antagonists***

252 Additional three independent experiments were carried out to evaluate the role of 1)  $\beta$   
253 adrenergic receptor antagonist propranolol (PROP) individually, 2) glucocorticoid receptor  
254 antagonist mifepristone (MIFE) individually, and 3) both in combination to determine their  
255 influence on ozone effects as published previously.<sup>27</sup> For each study, 12-13-week-old male  
256 WKY rats were randomized by body weight into four groups (vehicle/air, drug/air, vehicle/ozone,  
257 drug/ozone, n = 8/group). In the first experiment, rats were injected with either sterile saline  
258 (vehicle; 1 mL/kg, i.p.) or propranolol hydrochloride (PROP, Sigma-Aldrich, St Louis, MO; 10  
259 mg/kg in saline, i.p.). In the second experiment, rats were injected with pharmaceutical grade  
260 corn oil (vehicle; 1 mL/kg, s.c.) or mifepristone (MIFE, Cayman Chemical Co., Ann Arbor, MI; 30  
261 mg/kg in corn oil, s.c.). In the third experiment, rats were injected with vehicles, saline (1 ml/kg,  
262 i.p.) followed by corn oil (1 ml/kg, s.c.) or drugs, PROP (10 mg/kg, i.p.) followed by MIFE (30  
263 mg/kg, s.c.) (PROP+MIFE). The rationale for drug selection and treatment protocol are  
264 explained in our previous companion study.<sup>27</sup> To assure complete inhibition of  $\beta$ AR and GR  
265 receptors, the daily morning treatment began 7 days prior to the air or ozone exposure and was  
266 continued the day of exposure. In each study, rats were exposed to air or 0.8 ppm ozone for 4  
267 hours and glucose tolerance test (GTT) was performed immediately after exposure.

### 268 ***Glucose tolerance test for intervention studies***

269 For glucose telemetry, gain of function and pharmacological intervention studies,  
270 glucose tolerance test (GTT) was performed in rats after air or ozone exposure as previously  
271 described.<sup>18,28</sup> Since rats underwent air or ozone for 4 hours exposure prior to GTT when no  
272 food was provided, this served as fasting for GTT. Immediately after air or ozone exposure,

273 baseline blood glucose concentrations (0 hr) were determined by tail prick using a sterile 23-  
274 gauge needle with a Bayer Contour Glucometer (Leverkusen, Germany). Rats were then  
275 injected with 20% D-glucose (20% pharmaceutical grade D-glucose; Covetrus, Dublin, OH;  
276 diluted to 2 g/kg/10mL, i.p.) as described for telemetry experiment. Glucose levels were  
277 measured by tail prick at 30, 60, 90, and 120 min.

#### 278 ***Necropsy and blood samples collection for hormones in time course study***

279 For hormonal time course study, rats were necropsied within 15 minutes after each  
280 exposure. Necropsies were performed in a staggered manner. Rats were euthanized with Fatal  
281 Plus (sodium pentobarbital, Virbac AH, Inc., Fort Worth, TX; >200 mg/kg, i.p.). Blood samples  
282 were collected from the abdominal aorta directly in vacutainer serum separator tubes and EDTA  
283 tubes for serum and plasma separation, respectively. Blood samples were spun at 3500 x g for  
284 15 min at 4° C, serum and plasma samples were aliquoted and stored at -80 °C until analysis.  
285 Heart tissues were weighed to monitor spontaneous cardiac hypertrophy in this strain of rats.

#### 286 ***Plasma and serum analysis of hormones***

287 Plasma levels of epinephrine (adrenaline) and corticosterone were quantified using kits  
288 from Rocky Mountain Diagnostics (Colorado Springs, CO) and Arbor Assays (Ann Arbor, MI).  
289 Serum pituitary hormone levels for adrenocorticotrophic hormone (ACTH), thyroid stimulating  
290 hormone (TSH), prolactin (PRL), luteinizing hormone (LH), growth hormone (GH), brain-Derived  
291 neurotrophic factor (BDNF), and follicle stimulating hormone (FSH) were determined using  
292 MILLIPLEX MAP Rat Pituitary Magnetic Bead Panel following manufacturer's protocol (Merck-  
293 Millipore, Burlington, MA). Serum free fatty acids were measured using kits from Cell Biolabs,  
294 Inc (San Diego, CA adapted for use on a Konelab Arena 30 clinical analyzer (Thermo Chemical  
295 Lab Systems, Espoo, Finland). Serum insulin and leptin were quantified using Mesoscale  
296 Discovery® Multi-Spot® assay system following manufacturer's protocol (Rockville, MD).

#### 297 ***Statistics for hormones and glucose tolerance assessment data***

298 For all analyzed endpoints a p value less than 0.05 was considered significant and  
299 depending on the study, different approaches were taken for data analysis. For hormones and  
300 metabolite analysis, ozone concentration response was calculated using non-parametric one-  
301 way ANOVAs for each time point (Kruskal Wallis test). Dunn's multiple comparisons post-test  
302 was employed to determine the concentration effect for a given time point. The GTT data for all  
303 studies were analyzed as stated: In gain of function experiment, first one-way ANOVA (Kruskal-  
304 Wallis test) was employed to evaluate if ozone or AD effect was significant by analyzing vehicle-  
305 and CLEN+DEX-treated groups separately and if CLEN-DEX effect was significant, analyzing  
306 SH and AD groups separately. Ozone effect was calculated for matching surgery-drug-treated  
307 groups, AD effect was calculated for matching exposure-drug-treated groups, and CLEN+DEX  
308 effect was calculated for matching surgery-exposure groups. Dunn's multiple comparisons test  
309 was employed to calculate p values for each pair of comparison. For the antagonists, treatment  
310 in animals where beta adrenergic and/or glucocorticoid receptors were inhibited, three  
311 independent one-way ANOVAs (for PROP, MIFE and PROP+MIFE) were carried out. For each  
312 endpoint, one-way ANOVAs (Kruskal-Wallis test) were employed to evaluate whether the ozone  
313 effect (\*) was significant or drug effect (†) was significant. Dunn's multiple comparisons post-test  
314 was used to derive p values for each pair of comparison. For glucose tolerance test (GTT), area  
315 under the curve (AUC) was calculated using the trapezoidal method as previously described.<sup>23</sup>  
316 GraphPad Prism 9 (version 9.1.2) was used for statistical analysis and graph generation.

### 317 ***Assessment of glucose and cortisol in human clinical study samples***

318 Human plasma samples were obtained from a clinical study conducted through the  
319 University of North Carolina (Chapel Hill, NC) under IRB# #13-1644. The study involved  
320 exposure of young healthy human volunteers to filtered air or 0.3 ppm ozone exposure in a  
321 cross-over design where the same subjects were randomly exposed to air or ozone during two  
322 distinct visits that were separated by two weeks or longer. Prior consents were obtained from all  
323 individuals participating in the study. Blood samples were collected prior to and immediately

324 following 2-hour exposure to air or ozone for each of 34 subjects. Demographic information is  
325 provided in Table S2.

326 For human plasma samples, glucose levels were analyzed using Bayer Contour  
327 Glucometer and test strips (Leverkusen, Germany). Plasma cortisol levels were analyzed using  
328 human cortisol kit from Arbor Assays (Ann Arbor, MI). The percent change in human plasma  
329 levels of glucose and cortisol pre and post exposure was analyzed using a repeated measures  
330 one-way ANOVA. For human data, outliers were identified using boxplot method, defined as  
331 those above  $Q3 + 1.5 \text{ IQR}$  or below  $Q1 - 1.5 \text{ IQR}$  and discarded.

## 332 **RESULTS**

### 333 **Real-time *in vivo* glucose monitoring during and after ozone exposure**

334 We used a novel real-time blood glucose telemetry system (Figure 1A, Figure S1 and  
335 Table S2)<sup>20</sup> that has not been employed in previous air pollution studies. Using a cross-over  
336 design with the 7 telemetered rats, we obtained independent readings at each concentration for  
337 a weekly 4-hour exposure to air or ozone with 1-week washout (Table S1). We have shown that  
338 one week wash-out period after a single 4-hour ozone exposure is sufficient to clear effects from  
339 a previous exposure in rats.<sup>29</sup> Continuous monitoring of glucose during 4 hours of ozone  
340 exposure at various concentrations and post exposure periods in rats allowed insights in precise  
341 timing for a stressor to impact changes in circulating glucose and the longevity of a stress  
342 response. It also allowed monitoring of glucose intake-related changes and diurnal changes.  
343 Since glucose telemetry also included the assessment of core body temperature, we were able  
344 to show that a drop in core body temperature was related to glucose changes.

345 Hyperglycemia began to occur at ~90 min into a 4-hour ozone exposure but only in the  
346 0.8 ppm group (Figure 1B). The significance of a small reduction in this hyperglycemia at about  
347 3 hr and then reoccurrence of a peak between 4-5 hour during first day of exposure is unclear

348 but may reflect fine oscillatory adjustment in homeostatic processes, which might be important  
349 for centrally balanced and precisely controlled responses to ozone stress. A third peak of  
350 hyperglycemia in the 0.8 ppm ozone group was noted roughly 1 hour after the beginning of dark  
351 cycle (and 4 hours post cessation of ozone exposure) when rodents were active and feeding  
352 (Figure 1C). The increase in glucose at 90-min was associated with hypothermia in the 0.8 ppm  
353 ozone group, but without the fluctuations seen in glucose levels (Figure S2). We performed a  
354 glucose tolerance test (GTT) after ozone exposure in telemetered rats. These rats exhibited  
355 ozone-induced glucose intolerance in addition to hyperglycemia (Figure 1D) consistent with our  
356 previous studies involving post exposure assessment.<sup>18</sup> The telemetry data for blood glucose  
357 after bolus glucose injection matched the data obtained through a handheld glucometer (Figure  
358 1E). Combined, these data suggest that glucose monitoring in real-time offers opportunities to  
359 concurrently assess effects dietary glucose and acute environmental stressor effects. The  
360 temporal co-occurrence of ozone-induced hypothermia and hyperglycemia in the 0.8 ppm group  
361 suggests that these processes are linked or induced through common upstream events (Figure  
362 S3A). This hypothermia did not occur after glucose injection. In general, when glucose levels  
363 are high, core body temperature increases along with activity as noted during the dark cycle for  
364 rodents (Figure S3B). However, ozone-induced changes in blood glucose and body temperature  
365 were in the opposite direction, suggesting stress-induced disturbance in homeostasis to  
366 conserve metabolic energy and direct it where needed. Hypothermia, which has been linked to  
367 stress-induced glucocorticoid increases in humans<sup>30</sup> was also evident after ozone exposure in  
368 our previous study that employed real-time ECG monitoring in rats.<sup>31</sup>

### 369 **Real-time glucose monitoring during ozone adaptation and diurnal variation**

370 Repeated daily exposure to ozone has been associated with adaptation/tolerance in  
371 mice.<sup>32</sup> However, the mechanism of adaptation remains elusive. With the use of glucose

372 telemetry, we linked ozone adaptation to glucose changes and obtained precise timing of  
373 adaptation. After a 4-hour 0.8 ppm ozone exposure on the first day, hyperglycemia was not  
374 noted during subsequent days of no exposure (Figure 2A). The diurnal changes were apparent  
375 in all animals showing higher levels of glucose at nighttime when compared to daytime. After  
376 completing 4-week exposure using cross over design, animals were assigned air or 0.8 ppm  
377 ozone group for subsequent weeks. On the 5<sup>th</sup> and 6<sup>th</sup> week, these rats were exposed to air or  
378 0.8 ppm ozone for 4 hours using crossover design (alternating exposure assignment to air or  
379 ozone each week), and GTT was performed immediately following exposure. On week 7, again  
380 these animals were crossed over and exposed to air or 0.8 ppm ozone (4 hours each day) for 4  
381 consecutive days to determine if adaptation occurs with regards to glucose and body  
382 temperature changes during continued daily exposure. Ozone at 0.8 ppm 4 hours/day for 4  
383 consecutive days led to lack of increase in blood glucose during and right after the exposure on  
384 the third and fourth days (Figure 2B) despite continued exposure indicating adaptation. Animals  
385 assigned to ozone exhibited higher nighttime glucose levels even prior to beginning 4-day  
386 exposure protocol (Figure 2B). Although these elevated levels were small, they may relate to  
387 the difference in the characteristics of rats and their prior placement in crossover design.  
388 However, near complete adaptation to ozone exposure was evident by the 3<sup>rd</sup> day despite  
389 continued exposure on 3<sup>rd</sup> and 4<sup>th</sup> day. Thus, continuous glucose monitoring indicated that this  
390 adaptation occurs on the 3<sup>rd</sup> day but not on the 2<sup>nd</sup> day of ozone exposure, and this adaptation  
391 is associated with attenuation of ozone-induced hyperglycemia noted during ozone exposure on  
392 day 1 and day 2 (Figure 2B). The adaptation was also noted in hypothermia on the 3<sup>rd</sup> day  
393 (Figure S3C). These ozone-induced changes in circulating glucose of rats reflect the status of  
394 glucose metabolic processes in tissues.<sup>29</sup> Thus, real-time glucose monitoring allows one to  
395 assess the timings of metabolic alterations and adaptation during ozone exposure.

#### 396 **Temporality of ozone-induced HPA and SAM activation**

397           Since the method for continuous monitoring of corticosterone in animals is still not  
398 available, we next exposed rats to ozone for variable durations spanning a 4-hour time frame to  
399 assess temporal changes in adrenal-derived corticosterone and other neuroendocrine  
400 hormones (Figure 3A). This study followed a similar paradigm to real-time glucose monitoring  
401 but used a distinct cohort of rats at each timepoint during 4-hour ozone exposure to assess  
402 serum samples for key pituitary, adrenal-derived, and metabolic hormones (Figure 3). A sharp  
403 rise in adrenocorticotrophic hormone (ACTH) occurred at 30 min into the 0.8 ppm ozone  
404 exposure and peaked at 1 hour, reflecting the activation of the HPA axis and concomitant ACTH  
405 release from the anterior pituitary as early as 30 min (Figure 3B). Upon receiving stress signals  
406 in the paraventricular nucleus of the hypothalamus, the secreted corticotrophin releasing  
407 hormone traverses to the pituitary through the hypothalamic-pituitary portal system and  
408 activates ACTH secretion from the anterior pituitary. ACTH released into the systemic  
409 circulation reaches the adrenal cortex to stimulate corticosterone/cortisol synthesis and release  
410 involving hypothalamus-pituitary-adrenal (HPA) axis.<sup>10</sup> Consistent with this, we noted that the  
411 levels of circulating corticosterone in rats increased starting at 1 hour into ozone exposure (0.8  
412 ppm) prior to the increase in glucose and remained significantly elevated until 4 hours of  
413 exposure (Figure 3C)<sup>33</sup> despite the restoration of ACTH to baseline levels at this time point. It is  
414 important to note that although no significant ACTH increase occurred during the 0.4 ppm ozone  
415 exposure, the increase in corticosterone was significant at 4 hours, suggesting that the stress  
416 response was concentration dependent. Corticosterone/cortisol is a ligand for glucocorticoid  
417 receptors with ubiquitous tissue distribution and complex transcriptional regulation involved in  
418 maintaining immune and metabolic homeostatic processes and adaptation.<sup>34</sup>

419           The stress response induced by acute physical and emotional stress also involves the  
420 activation of the splanchnic sympathetic nerve via the hypothalamus leading to a release of  
421 epinephrine from chromaffin cells of the adrenal medulla.<sup>35</sup> The sympathetically mediated (SAM  
422 axis) epinephrine increase generally precedes the increases in corticosterone during a fight-or-



423 flight response. The data show that after 30 min of 0.8 ppm ozone exposure, the levels of  
424 epinephrine were increased. Exposure to the lower concentration of ozone (0.4 ppm) also  
425 caused an increase in epinephrine, although the time required for this increase was longer, as it  
426 evident only after 4 hours of exposure (Figure 3B).<sup>33</sup> The mechanism by which neural centers  
427 are activated immediately after ozone exposure is poorly understood. The role of the activation  
428 of vagal sensory fibers has been postulated in rats after acute ozone exposure.<sup>36</sup> The sustained  
429 increases in circulating epinephrine during the 4 hour of ozone exposure (Figure 2B)  
430 corroborated our prior findings involving a single end of exposure measurement.<sup>18,28</sup> These  
431 hormones, once released, can exert a wide-array of systemic metabolic, vascular, and  
432 immunological effects through adrenergic G-protein coupled receptors activation and  
433 subsequent cyclic AMP mediated signaling through protein kinase A.<sup>37</sup>

#### 434 **Temporal changes in HPT and HPG hormones during ozone exposure**

435         Since ozone-mediated stimulation of the neuroendocrine system may also influence  
436 other hypothalamic stress pathways such as hypothalamic-pituitary-thyroid (HPT) and  
437 hypothalamic-pituitary-gonadal (HPG) axes, we next assessed temporal effects of ozone  
438 exposure on relevant hormones. Recent evidence links exposure to air pollution with impaired  
439 thyroid function in newborns.<sup>38</sup> Earlier experimental studies have shown depletion of TSH and  
440 thyroxine after a single ozone exposure<sup>39</sup> and increased ozone pulmonary toxicity in rats treated  
441 with thyroxine.<sup>40</sup> We find here that ozone exposure results in time- and concentration-dependent  
442 decline in TSH levels, which occurs sooner (1 hour) at 0.8 ppm and is temporally linked to  
443 increases in corticosterone and precedes the increased glucose response with 0.8 ppm ozone  
444 (Figure 3B).

445         To gain additional insights in how other pituitary hormones involved in gonadal axis may  
446 also be impacted following ozone exposure, we next assessed follicle stimulating hormone  
447 (FSH), prolactin (PRL), and luteinizing hormone (LH) (Figure 3B). Exposure to air pollution has

448 been associated with poor reproductive performance and sperm quality.<sup>41</sup> However, only limited  
449 experimental evidence exists to support neuroendocrine mechanisms. We report that ozone  
450 exposure depleted not only LH, but also PRL (>95%), with the 0.8 ppm concentration causing a  
451 more rapid depletion. This corroborates our recent study where we reported a decrease in  
452 circulating PRL assessed once after 4 hour of ozone exposure.<sup>42</sup> Here, the temporal  
453 assessment shows depletion of circulating PRL as early as 1 hour into exposure concomitant  
454 with peak ACTH levels. However, LH levels did not decrease until 2-hour of exposure (Figure  
455 3B). The mechanism by which ozone may inhibit the release of PRL into the circulation in this  
456 study is unclear, however, its rapid decline and the reversal of ozone induced PRL depletion in  
457 adrenalectomized rats<sup>42</sup> suggests the possible involvement of glucocorticoid feedback  
458 regulation. While circulating glucocorticoids might also inhibit LH secretion after ozone  
459 exposure, a role of gonadotropin releasing hormone and gonadotropin inhibitory hormone is  
460 likely in ozone-induced inhibition of LH.<sup>43</sup> However, the levels of FSH were not changed after  
461 ozone exposure in male WKY rats (*data not shown*). These data provide insights on how acute  
462 ozone inhalation can dynamically and differentially impact various neuroendocrine axes that  
463 have major impact on homeostatic physiological processes.

464         Previously we noted ozone-induced pulmonary and liver transcriptional changes  
465 reflective of processes that regulate cell cycle, growth, and regeneration.<sup>44,45</sup> Since pituitary-  
466 derived growth hormone (GH) is involved in these processes,<sup>46</sup> and tied to metabolic changes,<sup>47</sup>  
467 we assessed the kinetics of growth hormone changes and noted that a delayed but  
468 concentration-dependent increase in GH occurred at 4-hour after ozone exposure suggesting  
469 that the anabolic processes are being activated (Figure 3B). A similar temporal pattern was  
470 noted for the increase in leptin, which regulates satiety at the level of hypothalamus. On the  
471 other hand, the increase in circulating free fatty acids was noted as early as 1 hour after ozone  
472 exposure, suggesting the early activation of lipolytic activity in adipose tissue coinciding with  
473 changes in circulating adrenal-derived hormones, but a delayed increase in GH coincides with

474 leptin release from adipose tissue. Overall, ozone-induced hyperglycemia is reflective of  
475 neuroendocrine responses that involve a wide array of changes in metabolic and cell growth  
476 processes.

477

#### 478 **The role of epinephrine and corticosterone in mediating hyperglycemia**

479 Adrenal-derived epinephrine and glucocorticoids are the major regulators of liver  
480 metabolic processes during stress,<sup>48</sup> and adrenalectomy diminishes ozone-induced  
481 hyperglycemia and glucose intolerance.<sup>23</sup> Therefore, we further assessed the roles of adrenal-  
482 derived stress hormones in mediating changes in circulating glucose after ozone exposure.  
483 Adrenalectomy, in addition to depleting circulating epinephrine and corticosterone also depletes  
484 circulating mineralocorticoids. To delineate the contribution of two major stress hormones,  
485 epinephrine and corticosterone, without the influence of mineralocorticoids, we conducted GTT  
486 in a gain of function experiment, where we treated sham (SH) and adrenalectomized (AD) rats  
487 with the  $\beta$ 2 adrenergic ( $\beta$ 2AR) agonist, clenbuterol (CLEN) plus glucocorticoid receptor (GR)  
488 agonist dexamethasone (DEX). Animals were treated with both drugs simultaneously prior to  
489 and during ozone exposure as reported.<sup>49</sup> In the second experiment, we inhibited epinephrine  
490 and corticosterone receptors, individually or in combination, to determine the role of each  
491 receptor type in mediating ozone-induced hyperglycemia and glucose intolerance. Rats were  
492 treated with pharmacological antagonist of  $\beta$ -adrenergic receptor ( $\beta$ AR), propranolol (PROP),  
493 and/or a GR antagonist mifepristone (MIFE) (Figure 4C) individually or in combination prior to  
494 and during ozone exposure as reported earlier.<sup>27</sup>

495 Ozone-induced hyperglycemia and glucose intolerance were nearly eliminated in  
496 vehicle-treated AD rats confirming our earlier findings.<sup>23</sup> Moreover, all animals treated with  
497 CLEN+DEX developed marked hyperglycemia and glucose intolerance, in both SH and AD rats  
498 exposed to air. Further, this response was exacerbated in rats exposed to ozone demonstrating

499  $\beta$ AR+GR activation through increased epinephrine and corticosterone mediating hyperglycemia  
500 (Figure 4B). PROP or MIFE given individually did not reduce ozone-induced hyperglycemia, but  
501 PROP+MIFE in combination, significantly decreased hyperglycemia severity. In a related  
502 manner, the blockade of  $\beta$ AR and GR individually only partially reversed ozone-induced glucose  
503 intolerance, but when given together, they markedly diminished ozone-induced glucose  
504 intolerance, suggesting the involvement of both epinephrine and glucocorticoids in mediating  
505 glucose increases during ozone exposure (Figure4C). These results allowed us to establish a  
506 causal link between ozone-induced increases in the release of adrenal-derived stress hormones  
507 through SAM and HPA activation and resultant glucose metabolic alterations. Together, these  
508 data suggest that real-time monitoring of glucose and cortisol levels may be used as a proxy for  
509 environmental pulmonary exposures.

#### 510 **Ozone-induced stress response in humans**

511 Hormonal response to stress is conserved across species, in this study we wanted to  
512 confirm if the results seen in rats would extend to humans. We assessed glucose and cortisol  
513 levels in plasma samples of human volunteers exposed to air or 0.3 ppm ozone during 2 hours  
514 of intermittent exercise in a cross-over design where each volunteer was exposed to air and ozone but  
515 separated by at least two weeks interval (IRB# #13-1644; Figure 5A). There were no differences in  
516 blood glucose levels between volunteers exposed to air or ozone (Figure 5B), likely since all  
517 subjects were exposed in a protocol involving intermittent exercise. In contrast, although  
518 exercise resulted in decreased cortisol levels in air exposed individuals, this decrease was  
519 significantly attenuated in volunteers exposed to ozone as determined by % change between  
520 pre- and postexposure (Figure 5B). Ozone exposure was thus, associated with significant  
521 increase in cortisol (Figure 5B), which is in concordance with our earlier observations in  
522 humans.<sup>19</sup> The present findings of cortisol increase demonstrate a coherent ozone-induced  
523 stress response between humans and rodents. Overall, the temporal monitoring of glucose and

524 cortisol in studies examining air pollution and other stressors may provide better understanding  
525 of the mechanisms of pathogenesis and individual variations in susceptibility for chronic  
526 diseases in humans.

527

## 528 **DISCUSSION**

529       Prior research on air pollution health effects focused primarily on cardiorespiratory  
530 outcomes elicited by local effects in the lung. Recently it has become apparent that inhaled  
531 irritant air pollutants might be perceived as stressors by the autonomic nervous system,  
532 resulting in stimulation of neuroendocrine axes which mediate acute effects in the lung and  
533 periphery.<sup>50</sup> The impairment and/or persistent hyperactivity of stress responses has been linked  
534 to chronic psychiatric, neurobehavioral, cardiometabolic, and reproductive health abnormalities.  
535 Since stress responses are dynamic and CNS-regulated to induce reversible peripheral  
536 changes, its real-time assessment is necessary for in-depth understanding of its impact on  
537 health and resiliency. We used real-time glucose telemetry in rats, combined with temporal  
538 assessment of corticosterone and other neuroendocrine hormones to demonstrate in rodents a  
539 contextual relationship between air pollution induced stress response and hyperglycemia. We  
540 demonstrated mechanistic link between hyperglycemia and adrenal-derived stress hormones  
541 using adrenalectomy and pharmacological interventions of adrenergic and glucocorticoid  
542 receptors ( $\beta$ AR and GR). We followed this up by showing coherency in the human stress  
543 response to ozone, providing initial evidence that real-time monitoring of glucose and human  
544 stress hormones may serve as immediate biomarkers of air-pollutant-induced pulmonary stress  
545 and the interactive impacts of other environmental contaminants, and non-chemical stressors.

546       Hyperglycemia is one of the earlier markers of stress-induced homeostatic changes that  
547 is consistently noted after a single ozone exposure<sup>18,23,28</sup> and other irritant exposures.<sup>51</sup> Here we  
548 show that the temporality of this neuroendocrine response induced by ozone can be assessed  
549 using real-time glucose telemetry in rats. We show that ozone-induced hyperglycemia, which

550 coincides with hypothermia during exposure, is preceded by changes in circulating anterior  
551 pituitary-derived hormones and the release of adrenal-derived epinephrine and corticosterone,  
552 linking the activation of SAM and HPA axes and the inhibition of HPT and HPG axes to  
553 hyperglycemia. Further, eliminating adrenal-derived stress hormones from circulation through  
554 adrenalectomy or pharmacologically inhibition of stress hormone receptors diminishes ozone-  
555 induced hyperglycemia, and treatment with stress hormone receptors agonists restores ozone-  
556 induced hyperglycemia in adrenalectomized rats. This glucose increase is transient,  
557 discontinuation of ozone exposure reverses hyperglycemia. Moreover, upon daily ozone  
558 exposure for 3 or more consecutive days, the ozone-induced hyperglycemic and hypothermia  
559 response is no longer evident, reflective of stress adaptation. This adaptation is nearly  
560 eliminated if ozone exposure re-occurs after 6 days of recovery, suggesting the adaptation  
561 response is also transient in an experimental setting. Combined, these results highlight the  
562 utility of real-time glucose measurement as a sensitive marker that reflects the impacts of near-  
563 term exposure, and when coupled with exposure assessments may be useful in linking source  
564 to outcomes. Further understanding of dynamic changes in circulating glucose and stress  
565 hormones could provide insights on real-time health status and individual susceptibility in  
566 humans.

567         The release of stress hormones by activation of SAM and HPA axes is integral in  
568 mediating key metabolic processes that channel energy resources where needed by acting on  
569 (AR) and glucocorticoid receptors (GR).<sup>52</sup> Here and in previous study<sup>19</sup> we show increased  
570 circulating cortisol after ozone exposure in humans demonstrating the conserved nature of  
571 stress responses and coherency between rodents and humans. Glucocorticoid feedback  
572 regulation on HPA activity, and the roles of mineralocorticoids and catecholamines, have been  
573 implicated in stress adaptation and the plasticity of organismal neural responses.<sup>10</sup> However,  
574 the full understanding of molecular mechanisms linked to impaired stress adaptation and  
575 neuropsychiatric disorders is still lacking. The adaptation from ozone-induced hyperglycemia on

576 the third consecutive day of exposure suggests a neuroendocrine contribution to ozone  
577 adaptation. This adaptation response was not evident on the second day of ozone exposure.  
578 Moreover, one-week of no exposure washout-period was associated with the loss of adaptation,  
579 indicating remarkable plasticity that may be influenced by stressor type, potency, and longevity  
580 of exposure. Given the contribution of glucocorticoids in stress adaptation,<sup>11</sup> and link between  
581 changes in circulating cortisol as well as blood glucose and chronic neurobehavioral and  
582 metabolic diseases,<sup>53,54</sup> the temporal assessment of changes in glucose and cortisol is critical  
583 for evaluation of health status and longevity of stressor effects. Further, the loss of dynamicity or  
584 oscillatory rhythms is an important indicator of chronic health issues,<sup>55</sup> which may provide  
585 additional insight from temporal monitoring.

586 Real-time glucose monitoring is now more frequently employed for diabetic individuals  
587 who require repeated assessment of blood glucose. In our study, we were able to assess  
588 increases in blood glucose during GTT and from food intake during nighttime in rats. Thus, the  
589 real-time glucose assessment offers the opportunity to study interactive effects of diet,  
590 metabolic disease, and stress from air pollutant exposures. Stress in diabetics may exacerbate  
591 preexistent hyperglycemia as reported in diabetic Goto Kakizaki rats<sup>56</sup> and in diabetic patients.<sup>57</sup>  
592 We have shown that ozone-induced hyperglycemia results from increased gluconeogenesis and  
593 impaired insulin secretion from pancreas.<sup>29</sup>

594 Combined, evidence of temporal and concentration-dependent changes in hormones  
595 associated with not only with SAM and HPA, but also in HPT and HPG axes during acute ozone  
596 exposure, indicate that the stress response involves a complex interplay of multiple  
597 neuroendocrine pathways. The selective activation of HPA and SAM axes was associated with  
598 concurrent inhibition of HPT and HPG axes as observed by changes in respective hormones.  
599 These responses are consistent with acute psychosocial stress-induced increases in ACTH and  
600 cortisol, which are associated with depletion of gonadal hormones in men and women.<sup>58</sup> This is  
601 contrast, however, with concurrent increases in thyroid hormone and corticosterone after

602 exercise in rats.<sup>59</sup> These findings indicate that stress responses may not be uniform between  
603 stressor types and that ozone may impact specific neuroendocrine pathways that involve input  
604 from multiple interactive signaling processes in the brain to develop a tailored, integrated and  
605 temporally regulated host response. The mechanisms by which anabolic pituitary hormones,  
606 ACTH and GH, increase while the catabolic hormones, TSH, FSH, LH and PRL, decrease after  
607 ozone exposure may involve a precise and selective activation or inhibition of upstream  
608 regulators of hormonal responses after ozone exposure, such as the activation of CRH neurons,  
609 FK506 binding protein regulation of glucocorticoid feedback, and other neurotropic factors within  
610 the nuclei of hippocampal commissure area, which can differentially influence a number of  
611 different pituitary hormonal axes through the paraventricular nucleus of the hypothalamus, as  
612 reported in birds.<sup>60</sup> Circulating corticosterone, cytokines, exhausting exercise, caloric  
613 deprivation, and even sepsis are linked to depletion of TSH, T4, and T3 in a stress paradigm.<sup>61</sup>  
614 We have shown that AD reverses ozone-induced inhibition of TSH release, suggesting a role for  
615 circulating adrenal-derived stress hormones.<sup>42</sup> Pituitary TSH release is regulated by  
616 hypothalamic thyrotropin releasing hormone (TRH) with feedback controls on HPT at different  
617 levels.<sup>62</sup> Thus, stressor specific differences in activation versus inhibition of given hormonal  
618 systems may impact downstream physiological responses.

619 We have previously noted that ozone-induced pulmonary transcriptional changes  
620 reflective of processes that regulate cell cycle growth and regeneration.<sup>45</sup> Since pituitary-derived  
621 growth hormone is involved in these processes,<sup>46</sup> and tied to metabolic changes,<sup>47</sup> we assessed  
622 kinetics of GH changes and noted a delayed but concentration-dependent increase at 4-hour  
623 after ozone exposure, suggesting that anabolic processes are being activated. Similar patterns  
624 were noted for increases in leptin, which regulates satiety at the level of the hypothalamus.  
625 However, the increase in circulating free fatty acids was noted as early as 1 hour, suggesting  
626 early activation of lipolytic activity in adipose tissue coinciding with changes in circulating



627 adrenal-derived hormones, but a delayed increase in GH coincides with leptin release from  
628 adipose tissue.

629 Our approach focused on the causal role of SAM and HPA axes on hyperglycemia  
630 response in a gain of function experiment using AD and stress hormone receptor  
631 agonists/antagonists.<sup>24</sup> This strategy is useful since AR and GR subtypes not only mediate  
632 pulmonary and peripheral metabolic effects induced by stress but also are the key regulators of  
633 central feedback mechanisms that govern the duration of stress responses and adaptation.<sup>10</sup>  
634 Given that stress hormones are involved in ozone-induced pulmonary and systemic effects, they  
635 likely regulate adaptation or tolerance with continued ozone exposure<sup>32,63</sup> and perhaps the  
636 suppression of thyroid and gonadal axes. We have recently reported that gene expression  
637 changes induced by a single 4-hour ozone exposure in the brain stem and hypothalamus were  
638 found to be similar to those induced by glucocorticoids and are markedly reduced in AD rats  
639 implying the role of glucocorticoids in feedback regulation of stress response.<sup>42</sup>

640 Increased circulating epinephrine and glucocorticoids regulate glucose metabolic  
641 processes through their action on multiple tissues, including the liver and pancreas.<sup>64</sup> AD or  
642 combination treatment with pharmacological blockers of  $\beta$ AR and GR inhibited ozone-induced  
643 hyperglycemia and glucose intolerance while each antagonist individually was less effective.  
644 The combination of agonists amplified ozone-induced hyperglycemia and glucose intolerance.  
645 We have previously shown that ozone exposure is associated with increased gluconeogenesis  
646 and inhibition of glucose-mediated insulin secretion in rats.<sup>29</sup> Each AR and GR subtype may be  
647 selectively influencing different processes of glucose metabolism, such as gluconeogenesis,  
648 and  $\beta$ -cell insulin secretion in the liver and pancreas. These changes following acute ozone  
649 exposure suggest that repeated intermittent exposure may exacerbate or initiate metabolic  
650 syndrome.<sup>29</sup>

651 Stress response is proportional to stressor severity, and the duration, and is precisely  
652 directed to the affected organ system. This response is reversible upon stress discontinuation

653 and in some cases, even after continued stressor application (habituation). Because it involves  
654 common neuroendocrine pathways and physiological processes,<sup>9</sup> air-pollution induced acute-  
655 stress response is considered non-specific. However, all observed acute ozone-induced  
656 pathological sequelae, including lung injury and inflammation, and metabolic homeostatic  
657 changes are linked to this stress response. Moreover, these reversible stressor effects in  
658 healthy individuals can be impaired in susceptible individuals both at the CNS and peripheral  
659 organ levels, contributing to health burdens from environmental exposure.<sup>55</sup> Based on evidence  
660 presented in this paper, we assert that evaluation of the dynamicity of this response through  
661 real-time glucose and cortisol monitoring could unravel critical information on the magnitude and  
662 persistence of stress from environmental exposures and its impairment in individuals with  
663 preexisting diseases including psychosocial and metabolic. Using ozone inhalation as an  
664 example, we demonstrate the utility of such an approach to monitor the dynamics of stressor  
665 effects on human health that is amenable with currently available technologies.<sup>65</sup>

666 This study assessed responses after exposure to only ozone. While we have shown  
667 similar changes in stress hormones and glucose after exposure to other gaseous irritant,  
668 acrolein,<sup>51</sup> this response may be linked to irritancy and should not be generalized to all  
669 pollutants and pollution mixtures. Similarly, the nature and timing of responses to other  
670 stressors may vary leading to differences in the organ being affected and the duration of  
671 pathogenesis. Moreover, this study assessed only acute health outcomes in healthy animals  
672 after inhaled ozone exposure, however, the mechanisms by which repeated exposures and  
673 underlying health conditions may lead to increased disease susceptibility can be better studied  
674 using models of compromised health status. Finally, species variation among humans and the  
675 rodent model in respiratory anatomy and function as well the uniqueness of the hypothermic  
676 response to ozone in rats are important caveats when translating findings to humans. The rat  
677 model, however, has long been used to successfully predict the adverse cardiorespiratory

678 response potential of air pollution in humans and we show that humans respond to ozone stress  
679 in a similar manner to rodents.

680 In conclusion, we show that health effects of air pollution-induced stress can be  
681 monitored in real-time by assessment of blood glucose using telemetry and where possible  
682 cortisol/corticosterone in experimental models and in humans. Our data show that exposure to  
683 prototypic air pollutant (ozone) rapidly induces anabolic (ACTH, GH) while inhibiting catabolic  
684 (HPT, HPG) neuroendocrine pathways along with sympathetic activation and adrenal medullary  
685 release of epinephrine and HPA-mediated release of glucocorticoids. These reversible and  
686 dynamic neuroendocrine changes are associated with increases in circulating corticosterone  
687 and other neuroendocrine hormones, which is followed by systemic metabolic alterations and  
688 hyperglycemia as well as hypothermia during ozone exposure. We further mechanistically  
689 confirm the contribution of adrenal-derived stress hormones based on the evidence that AD and  
690 pharmacological inhibitors of stress hormones eliminate and agonists reverse ozone-induced  
691 metabolic effects. Since dynamic changes in circulating stress hormones likely mediate  
692 interactive metabolic effects of chemical stressors such as ozone, as well as non-chemical  
693 stressors, this approach may be useful in assessing health effects and susceptibility variations  
694 in epidemiological studies.

695 **Disclaimer:** The research described in this article has been reviewed by the Center for Public  
696 Health and Environmental Assessment, U.S. Environmental Protection Agency, and approved  
697 for publication. Approval does not signify that the contents necessarily reflect the views and  
698 policies of the Agency, nor does the mention of trade names of commercial products constitute  
699 endorsement or recommendation for use. All opinions expressed in this paper are of the  
700 author's and do not necessarily reflect the policies and views of DOE, or ORAU/ORISE.

701

702 **Funding:** This research was supported by the intramural research program of the U.S.  
703 Environmental Protection Agency (EPA). Partial support also came through an appointment of  
704 ARH to the U.S. EPA Research Participation Program administered by the Oak Ridge Institute  
705 for Science and Education (ORISE) through an interagency agreement between the U.S.  
706 Department of Energy (DOE) and the U.S. EPA. ORISE is managed by ORAU under DOE  
707 contract number DE-SC0014664.

708

709 The authors declare no conflict of interest.

710

711 **Acknowledgements:** The authors thank Dr. M. Ian Gilmour of the U.S. EPA, Dr. Daniel L. Costa  
712 of the University of North Carolina (Formerly of the U.S. EPA) and Dr. Andrey Egorov of the U.S.  
713 EPA for their critical review of the manuscript. We acknowledge the help of Dr. Mark Higuchi and  
714 Mr. Abdul Malek Khan of the US EPA for ozone inhalation exposures.

#### 715 **ORCID**

716 Urmila P Kodavanti - <https://orcid.org/0000-0001-6333-1024>

717 Andres R Henriquez - <https://orcid.org/0000-0002-1917-4153>

718 Samantha J. Snow - <https://orcid.org/0000-0003-1812-8582>

719

#### 720 **Author Contributions:**

721

722 A.R.H, S.J.S., U.P.K. designed experiments, data collection, analysis and interpretation,  
723 manuscript preparation; M.C.S., H.R., A.F. R.G. performed research; A.F. data collection and  
724 analysis; C.N.M. performed research and manuscript preparation; J.H., A.M.-R. data analysis  
725 and manuscript preparation.

726

## 727 REFERENCES

- 728 1. Landrigan PJ, Fuller R, Acosta NJR, et al. The Lancet Commission on pollution and health.  
729 Lancet. 2018;391(10119):462-512.  
730
- 731 2. Calderón-Garcidueñas L, Herrera-Soto A, Jury N, et al. Reduced repressive epigenetic marks,  
732 increased DNA damage and Alzheimer's disease hallmarks in the brain of humans and mice  
733 exposed to particulate urban air pollution. *Environ Res*. 2020;183:109226.  
734 doi:10.1016/j.envres.2020.109226.
- 735 3. Greve HJ, Mumaw CL, Messenger EJ, Kodavanti PRS, Royland JL, Kodavanti UP, Block ML.  
736 Diesel exhaust impairs TREM2 to dysregulate neuroinflammation. *J Neuroinflammation*. 2020  
737 Nov 22;17(1):351. doi: 10.1186/s12974-020-02017-7. PMID: 33222683; PMCID: PMC7682066.
- 738 4. Paul KC, Jerrett M, Ritz B. Type 2 Diabetes Mellitus and Alzheimer's Disease: Overlapping  
739 Biologic Mechanisms and Environmental Risk Factors. *Curr Environ Health Rep*. 2018;5(1):44-  
740 58. doi:10.1007/s40572-018-0176-1
- 741 5. Berman JD, Burkhardt J, Bayham J, Carter E, Wilson A. Acute Air Pollution Exposure and the  
742 Risk of Violent Behavior in the United States. *Epidemiology*. 2019;30(6):799-806.  
743 doi:10.1097/EDE.0000000000001085.
- 744 6. Camargo Maluf F, Feder D, Alves de Siqueira Carvalho A. Analysis of the Relationship between  
745 Type II Diabetes Mellitus and Parkinson's Disease: A Systematic Review. *Parkinsons Dis*.  
746 2019;2019:4951379. Published 2019 Nov 23. doi:10.1155/2019/4951379.
- 747 7. Norwitz NG, Mota AS, Norwitz SG, Clarke K. Multi-Loop Model of Alzheimer Disease: An  
748 Integrated Perspective on the Wnt/GSK3 $\beta$ ,  $\alpha$ -Synuclein, and Type 3 Diabetes Hypotheses. *Front*  
749 *Aging Neurosci*. 2019;11:184. Published 2019 Jul 31. doi:10.3389/fnagi.2019.00184.
- 750 8. Hajat A, Diez Roux AV, Castro-Diehl C, et al. The Association between Long-Term Air Pollution  
751 and Urinary Catecholamines: Evidence from the Multi-Ethnic Study of Atherosclerosis. *Environ*  
752 *Health Perspect*. 2019;127(5):57007. doi:10.1289/EHP3286.
- 753 9. Russell G, Lightman S. The human stress response. *Nat Rev Endocrinol*. 2019;15(9):525-534.  
754 doi:10.1038/s41574-019-0228-0.  
755
- 756 10. Herman JP, Nawreen N, Smail MA, Cotella EM. Brain mechanisms of HPA axis regulation:  
757 neurocircuitry and feedback in context Richard Kvetnansky lecture. *Stress*. 2020 Nov;23(6):617-  
758 632. doi: 10.1080/10253890.2020.1859475. Epub 2020 Dec 21. PMID: 33345670; PMCID:  
759 PMC8034599.
- 760 11. Biessels GJ, Despa F. Cognitive decline and dementia in diabetes mellitus: mechanisms and  
761 clinical implications. *Nat Rev Endocrinol*. 2018;14(10):591–604. doi:10.1038/s41574-018-0048-7.
- 762 12. Danan D, Matar MA, Kaplan Z, Zohar J, Cohen H. Blunted basal corticosterone pulsatility predicts  
763 post-exposure susceptibility to PTSD phenotype in rats. *Psychoneuroendocrinology*. 2018  
764 Jan;87:35-42. doi: 10.1016/j.psyneuen.2017.09.023. Epub 2017 Oct 7. PMID: 29035710.
- 765 13. Faulenbach M, Uthoff H, Schwegler K, Spinass GA, Schmid C, Wiesli P. Effect of psychological  
766 stress on glucose control in patients with Type 2 diabetes. *Diabet Med*. 2012;29(1):128-131.  
767 doi:10.1111/j.1464-5491.2011.03431.x
- 768 14. Teyin E, Derbent A, Balcioglu T, Cokmez B. The efficacy of caudal morphine or bupivacaine  
769 combined with general anesthesia on postoperative pain and neuroendocrine stress response in  
770 children. *Paediatr Anaesth*. 2006;16(3):290-296. doi:10.1111/j.1460-9592.2005.01711.x.
- 771 15. Hásková A, Radovnická L, Petruželková L, Parkin CG, Grunberger G, Horová E, Navrátilová V,  
772 Kádě O, Matoulek M, Prázný M, Šoupal J. Real-time CGM Is Superior to Flash Glucose  
773 Monitoring for Glucose Control in Type 1 Diabetes: The CORRIDA Randomized Controlled Trial.

- 774 Diabetes Care. 2020 Nov;43(11):2744-2750. doi: 10.2337/dc20-0112. Epub 2020 Aug 28. PMID:  
775 32859607; PMCID: PMC7576432.
- 776 16. Baghelani, M., Abbasi, Z., Daneshmand, M. *et al.* Non-invasive continuous-time glucose  
777 monitoring system using a chipless printable sensor based on split ring microwave resonators.  
778 *Sci Rep* **10**, 12980 (2020). doi.org/10.1038/s41598-020-69547-1
- 779 17. Torrente-Rodríguez RM, Tu J, Yang Y, et al. Investigation of cortisol dynamics in human sweat  
780 using a graphene-based wireless mHealth system. *Matter*. 2020;2(4):921-937.  
781 doi:10.1016/j.matt.2020.01.021.
- 782 18. Miller DB, Karoly ED, Jones JC, et al. Inhaled ozone (O<sub>3</sub>)-induces changes in serum  
783 metabolomic and liver transcriptomic profiles in rats. *Toxicol Appl Pharmacol*. 2015;286(2):65–79.  
784 doi:10.1016/j.taap.2015.03.025
- 785 19. Miller DB, Ghio AJ, Karoly ED, et al. Ozone Exposure Increases Circulating Stress Hormones  
786 and Lipid Metabolites in Humans. *Am J Respir Crit Care Med*. 2016;193(12):1382–1391.  
787 doi:10.1164/rccm.201508-1599OC
- 788 20. Brockway, R., Tiesma, S. Bogie, H., White, K., Fine, M., O'Farrell, L., Michael, M., Cox., A.  
789 Coskun T. 2015. Fully Implantable Arterial Blood Glucose Device for Metabolic Research  
790 Applications in Rats for Two Months. *J Diabetes Sci Technol*. 9(4):771-81.
- 791 21. Henriquez AR, Snow SJ, Schladweiler MC, et al. Adrenergic and glucocorticoid receptor  
792 antagonists reduce ozone-induced lung injury and inflammation. *Toxicol Appl Pharmacol*.  
793 2018;339:161–171. doi:10.1016/j.taap.2017.12.006
- 794 22. Shannahan, J.H., Schladweiler, M.C., Richards, J.H., Ledbetter, A.D., Ghio, A.J., Kodavanti, U.P.,  
795 2010. Pulmonary oxidative stress, inflammation, and dysregulated iron homeostasis in rat models  
796 of cardiovascular disease. *J. Toxicol. Environ. Health A*. 73 (10), 641–656.
- 797 23. Miller DB, Snow SJ, Schladweiler MC, et al. Acute Ozone-Induced Pulmonary and Systemic  
798 Metabolic Effects Are Diminished in Adrenalectomized Rats. *Toxicol Sci*. 2016b;150(2):312–322.  
799 doi:10.1093/toxsci/kfv331
- 800 24. Henriquez AR, Snow SJ, Schladweiler MC, et al. Beta-2 Adrenergic and Glucocorticoid Receptor  
801 Agonists Modulate Ozone-Induced Pulmonary Protein Leakage and Inflammation in Healthy and  
802 Adrenalectomized Rats. *Toxicol Sci*. 2018;166(2):288–305. doi:10.1093/toxsci/kfy198
- 803 25. Griffin, É. W., Yssel, J. D., O'Neill, E., Ryan, K. J., Boyle, N., Harper, P., Harkin, A., and Connor,  
804 T. (2018). The b2-adrenoceptor agonist clenbuterol reduces the neuroinflammatory response,  
805 neutrophil infiltration and apoptosis following intra- striatal IL-1b administration to rats.  
806 *Immunopharmacol. Immunotoxicol*. 40, 99–106.
- 807 26. Jonasson, S., Wigenstam, E., Koch, B., and Bucht, A. (2013). Early treatment of chlorine-induced  
808 airway hyperresponsiveness and inflammation with corticosteroids. *Toxicol. Appl. Pharmacol*.  
809 271, 168–174.
- 810 27. Henriquez AR, Snow SJ, Schladweiler MC, Miller CN, Dye JA, Ledbetter AD, Richards JE,  
811 Mauge-Lewis K, McGee MA, Kodavanti UP. Adrenergic and glucocorticoid receptor antagonists  
812 reduce ozone-induced lung injury and inflammation. *Toxicol Appl Pharmacol*. 2018 Jan  
813 15;339:161-171. doi: 10.1016/j.taap.2017.12.006. Epub 2017 Dec 13. PMID: 29247675; PMCID:  
814 PMC7110430.
- 815 28. Bass V, Gordon CJ, Jarema KA, et al. Ozone induces glucose intolerance and systemic  
816 metabolic effects in young and aged Brown Norway rats. *Toxicol Appl Pharmacol*.  
817 2013;273(3):551–560. doi:10.1016/j.taap.2013.09.029.

- 818 29. Miller DB, Snow SJ, Henriquez A, et al. Systemic metabolic derangement, pulmonary effects, and  
819 insulin insufficiency following subchronic ozone exposure in rats. *Toxicol Appl Pharmacol.*  
820 2016c;306:47–57. doi:10.1016/j.taap.2016.06.027
- 821 30. Kainuma E, Watanabe M, Tomiyama-Miyaji C, et al. Association of glucocorticoid with stress-  
822 induced modulation of body temperature, blood glucose and innate  
823 immunity. *Psychoneuroendocrinology.* 2009;34(10):1459-1468.  
824 doi:10.1016/j.psyneuen.2009.04.021.
- 825 31. Gordon CJ, Johnstone AF, Aydin C, et al. Episodic ozone exposure in adult and senescent Brown  
826 Norway rats: acute and delayed effect on heart rate, core temperature and motor activity. *Inhal*  
827 *Toxicol.* 2014;26(7):380–390. doi:10.3109/08958378.2014.905659.
- 828 32. Hamade AK, Tankersley CG. Inter strain variation in cardiac and respiratory adaptation to  
829 repeated ozone and particulate matter exposures. *Am J Physiol Regul Integr Comp Physiol.*  
830 2009;296(4):R1202–R1215. doi:10.1152/ajpregu.90808.2008.
- 831 33. Henriquez AR, Williams W, Snow SJ, Schladweiler MC, Fisher C, Hargrove MM, Alewel D,  
832 Colonna C, Gavett SH, Miller CN, Kodavanti UP. The dynamicity of acute ozone-induced  
833 systemic leukocyte trafficking and adrenal-derived stress hormones. *Toxicology.* 2021 Jun  
834 30;458:152823. doi: 10.1016/j.tox.2021.152823. Epub 2021 May 26. PMID: 34051339.
- 835 34. Oakley RH, Cidlowski JA. The biology of the glucocorticoid receptor: new signaling mechanisms  
836 in health and disease. *J Allergy Clin Immunol* 2013, Nov;132(5), 1033-44. PMID: 24084075;  
837 PMCID: PMC4084612.
- 838 35. Okada S, Yamaguchi N. Possible role of adrenoceptors in the hypothalamic paraventricular  
839 nucleus in corticotropin-releasing factor-induced sympatho-adrenomedullary outflow in rats.  
840 *Auton Neurosci.* 2017 Mar;203:74-80. doi: 10.1016/j.autneu.2017.01.008. PMID: 28202248.
- 841 36. Gackière F, Saliba L, Baude A, Bosler O, Strube C. Ozone inhalation activates stress-responsive  
842 regions of the CNS. *J Neurochem.* 2011;117(6):961-972. doi:10.1111/j.1471-4159.2011.07267.x
- 843 37. Lohse MJ. The ins and outs of adrenergic signaling. *J Mol Med (Berl).* 2015;93(9):955–962.  
844 doi:10.1007/s00109-015-1323-x
- 845 38. Howe CG, Eckel SP, Habre R, et al. Association of Prenatal Exposure to Ambient and Traffic-  
846 Related Air Pollution With Newborn Thyroid Function: Findings From the Children's Health  
847 Study. *JAMA Netw Open.* 2018;1(5):e182172. Published 2018 Sep 7.  
848 doi:10.1001/jamanetworkopen.2018.2172
- 849 39. Clemons GK, Garcia JF. Changes in thyroid function after short-term ozone exposure in rats. *J*  
850 *Environ Pathol Toxicol.* 1980 Aug;4(1):359-69.  
851
- 852 40. Huffman LJ, Judy DJ, Brumbaugh K, Frazer DG, Reynolds JS, McKinney WG, Goldsmith WT.  
853 Hyperthyroidism increases the risk of ozone-induced lung toxicity in rats. *Toxicol Appl Pharmacol.*  
854 2001 May 15;173(1):18-26.  
855
- 856 41. Jurewicz J, Dziewirska E, Radwan M, Hanke W. Air pollution from natural and anthropic sources  
857 and male fertility. *Reprod Biol Endocrinol.* 2018;16(1):109. Published 2018 Dec 23.  
858 doi:10.1186/s12958-018-0430-2
- 859 42. Henriquez AR, House JS, Snow SJ, et al. Ozone-induced dysregulation of neuroendocrine axes  
860 requires adrenal-derived stress hormones [published online ahead of print, 2019 Aug 9]. *Toxicol*  
861 *Sci.* 2019a;kfz182. doi:10.1093/toxsci/kfz182
- 862 43. Kirby ED, Geraghty AC, Ubuka T, Bentley GE, Kaufer D. Stress increases putative gonadotropin  
863 inhibitory hormone and decreases luteinizing hormone in male rats. *Proc Natl Acad Sci U S A.*  
864 2009 Jul 7;106(27):11324-9.

- 865  
866 44. Henriquez A, House J, Miller DB, et al. Adrenal-derived stress hormones modulate ozone-  
867 induced lung injury and inflammation. *Toxicol Appl Pharmacol.* 2017;329:249–258.  
868 doi:10.1016/j.taap.2017.06.009.
- 869 45. Colonna CH, Henriquez AR, House JS, Motsinger-Reif AA, Alewel DI, Fisher A, Ren H, Snow SJ,  
870 Schladweiler MC, Miller DB, Miller CN, Kodavanti PRS, Kodavanti UP. The Role of Hepatic Vagal  
871 Tone in Ozone-Induced Metabolic Dysfunction in the Liver. *Toxicol Sci.* 2021 May 27;181(2):229-  
872 245. doi: 10.1093/toxsci/kfab025. PMID: 33662111; PMCID: PMC8162638.
- 873 46. Lim CT, Khoo B. Normal Physiology of ACTH and GH Release in the Hypothalamus and Anterior  
874 Pituitary in Man. In: Feingold KR, Anawalt B, Boyce A, et al., eds. *Endotext.* South Dartmouth  
875 (MA): MDTText.com, Inc.; 2000.  
876
- 877 47. Qiu H, Yang JK, Chen C. Influence of insulin on growth hormone secretion, level and growth  
878 hormone signalling. *Sheng Li Xue Bao.* 2017;69(5):541–556.  
879
- 880 48. Napolitano G, Barone D, Di Meo S, Venditti P. Adrenaline induces mitochondrial biogenesis in  
881 rat liver. *J Bioenerg Biomembr.* 2018 Feb;50(1):11-19.  
882
- 883 49. Henriquez AR, Snow SJ, Schladweiler MC, Miller CN, Dye JA, Ledbetter AD, Hargrove MM,  
884 Richards JE, Kodavanti UP. Exacerbation of ozone-induced pulmonary and systemic effects by  
885  $\beta_2$ -adrenergic and/or glucocorticoid receptor agonist/s. *Sci Rep.* 2019 Nov 29;9(1):17925. doi:  
886 10.1038/s41598-019-54269-w. PMID: 31784596; PMCID: PMC6884479.
- 887 50. Kodavanti UP. Susceptibility Variations in Air Pollution Health Effects: Incorporating  
888 Neuroendocrine Activation. *Toxicol Pathol.* 2019;47(8):962–975.  
889 doi:10.1177/0192623319878402.
- 890 51. Snow SJ, McGee MA, Henriquez A, et al. Respiratory Effects and Systemic Stress Response  
891 Following Acute Acrolein Inhalation in Rats. *Toxicol Sci.* 2017;158(2):454–464.  
892 doi:10.1093/toxsci/kfx108
- 893 52. Begg DP, Woods SC. Interactions between the central nervous system and pancreatic islet  
894 secretions: a historical perspective. *Adv Physiol Educ.* 2013 Mar;37(1):53-60. doi:  
895 10.1152/advan.00167.2012. PMID: 23471249; PMCID: PMC3776474.
- 896 53. Schatzberg AF, Lindley S. Glucocorticoid antagonists in neuropsychiatric [corrected] disorders.  
897 *Eur J Pharmacol.* 2008 Apr 7;583(2-3):358-64. doi: 10.1016/j.ejphar.2008.01.001. Epub 2008 Jan  
898 19. Erratum in: *Eur J Pharmacol.* 2008 Sep 11;592(1-3):168. PMID: 18339372.
- 899 54. Morgese MG, Schiavone S, Trabace L. Emerging role of amyloid beta in stress response:  
900 Implication for depression and diabetes. *Eur J Pharmacol.* 2017 Dec 15;817:22-29. doi:  
901 10.1016/j.ejphar.2017.08.031. Epub 2017 Aug 24. PMID: 28844871.
- 902 55. Berger M, Sarnyai Z. "More than skin deep": stress neurobiology and mental health  
903 consequences of racial discrimination. *Stress.* 2015;18(1):1-10.  
904 doi:10.3109/10253890.2014.989204.
- 905 56. Snow SJ, Henriquez AR, Fisher A, Vallanat B, House JS, Schladweiler MC, Wood CE, Kodavanti  
906 UP. Peripheral metabolic effects of ozone exposure in healthy and diabetic rats on normal or  
907 high-cholesterol diet. *Toxicol Appl Pharmacol.* 2021 Mar 15;415:115427. doi:  
908 10.1016/j.taap.2021.115427. Epub 2021 Jan 30. PMID: 33524448; PMCID: PMC8086744.
- 909 57. Goetsch VL, VanDorsten B, Pbert LA, Ullrich IH, Yeater RA. Acute effects of laboratory stress on  
910 blood glucose in noninsulin-dependent diabetes. *Psychosom Med.* 1993;55(6):492-496.  
911 doi:10.1097/00006842-199311000-00004



- 912 58. Stephens MA, Mahon PB, McCaul ME, Wand GS. Hypothalamic-pituitary-adrenal axis response  
913 to acute psychosocial stress: Effects of biological sex and circulating sex  
914 hormones. *Psychoneuroendocrinology*. 2016;66:47–55. doi:10.1016/j.psyneuen.2015.12.021
- 915 59. Parra-Montes de Oca MA, Gutiérrez-Mariscal M, Salmerón-Jiménez MF, Jaimes-Hoy L, Charli  
916 JL, Joseph-Bravo P. Voluntary Exercise-Induced Activation of Thyroid Axis and Reduction of  
917 White Fat Depots Is Attenuated by Chronic Stress in a Sex Dimorphic Pattern in Adult Rats. *Front*  
918 *Endocrinol (Lausanne)*. 2019;10:418. Published 2019 Jun 26. doi:10.3389/fendo.2019.00418.
- 919 60. Kadhim HJ, Kang SW, Kuenzel WJ. Possible roles of brain derived neurotrophic factor and  
920 corticotropin releasing hormone neurons in the nucleus of hippocampal commissure functioning  
921 within the avian neuroendocrine regulation of stress. *Stress*. 2021 May 28:1-12. doi:  
922 10.1080/10253890.2021.1929163. Epub ahead of print. PMID: 34003076.
- 923 61. Chatzitomatis A, Hoermann R, Midgley JE, et al. Thyroid Allostatic-Adaptive Responses of  
924 Thyrotropic Feedback Control to Conditions of Strain, Stress, and Developmental  
925 Programming. *Front Endocrinol (Lausanne)*. 2017;8:163. Published 2017 Jul 20.  
926 doi:10.3389/fendo.2017.00163.
- 927 62. Joseph-Bravo P, Jaimes-Hoy L, Uribe RM, Charli JL. 60 YEARS OF NEUROENDOCRINOLOGY:  
928 TRH, the first hypophysiotropic releasing hormone isolated: control of the pituitary-thyroid axis  
929 [published correction appears in *J Endocrinol*. 2015 Dec;227(3):X3]. *J Endocrinol*.  
930 2015;226(2):T85–T100. doi:10.1530/JOE-15-0124.
- 931 63. Farrell BP, Kerr HD, Kulle TJ, Sauder LR, Young JL. Adaptation in human subjects to the effects  
932 of inhaled ozone after repeated exposure. *Am Rev Respir Dis*. 1979 May;119(5):725-30. doi:  
933 10.1164/arrd.1979.119.5.725. PMID: 453698.
- 934 64. Kuo T, McQueen A, Chen TC, Wang JC. Regulation of Glucose Homeostasis by  
935 Glucocorticoids. *Adv Exp Med Biol*. 2015;872:99–126. doi:10.1007/978-1-4939-2895-8\_5.
- 936 65. Patlar Akbulut F, Ikitimur B, Akan A. Wearable sensor-based evaluation of psychosocial stress in  
937 patients with metabolic syndrome. *Artif Intell Med*. 2020;104:101824.  
938 doi:10.1016/j.artmed.2020.101824.

939 **Figure Captions**

940 **Figure 1.** Real-time glucose monitoring in freely moving animals reveal dynamicity of ozone-  
941 induced changes and response to glucose injection. A) A schema showing surgical implantation  
942 of glucose radiotelemetry devices followed by recovery and then ozone exposure at different  
943 concentrations. Glucose levels were measured real-time in a weekly cross over design over 4  
944 weeks and averages of every minute are plotted as mean  $\pm$  SEM of n=5-6 exposures. B) Real-  
945 time changes in blood glucose levels during 4 hours of air (0.0 ppm) or ozone exposure (0.2,  
946 0.4, and 0.8 ppm). C) Glucose levels during first 24 hours after 4-hour air or ozone exposure  
947 (n=5-6). D) Glucose levels during 5<sup>th</sup> and 6<sup>th</sup> week of cross-over exposure to air or 0.8 ppm  
948 ozone and during glucose tolerance test performed immediately following exposure (n=6). E)  
949 Comparison of glucose levels measured through tail prick every 30 min and during continuous  
950 monitoring through telemetry (n=3-4). F) comparison of baseline glucose levels assessed using  
951 tail prick and telemetry following 4-hour air or ozone exposure. G) Comparison of area under the  
952 curve assessment of glucose tolerance test showing similarity in the glucose levels assessed  
953 using tail prick and those assessed through telemetry.

954 **Figure 2.** Recovery from a single 4-hour ozone exposure induced hyperglycemia, diurnal  
955 variation, and adaptation during repeated ozone exposure. A) Glucose levels were measured  
956 real-time in a weekly cross over design over 4 weeks and averaged for every minute are plotted  
957 as mean of n=5-6 exposures. The data show ozone-induced hyperglycemia during and  
958 following exposure and reversal of this effect in subsequent non-exposure days. Note the higher  
959 levels of circulating glucose at nighttime when animals are active and feeding. B) Ozone-  
960 induced hyperglycemia during repeated daily 4-hour exposure for 4 consecutive days followed  
961 by 3-day non-exposure period showing nearly complete adaptation on day 3 and day 4 where  
962 no ozone effect is evident (n=3-4/group).

963 **Figure 3.** Temporal changes in anterior pituitary, adrenal-derived, and metabolic hormones, as  
964 well as circulating metabolites during 4-hour exposure to air or ozone. A separate cohort of

965 healthy rats were exposed to air or ozone at 0.4 or 0.8 ppm for 30 min, 1 hour, 2 hour or 4 hour  
966 and necropsies were performed immediately following each exposure (within 15-20 min to  
967 collect blood samples). A) experimental design; B) serum pituitary and adrenal-derived stress  
968 hormones; and C) metabolic hormones and levels of free fatty acids. Data show mean  $\pm$  SEM  
969 (n=6-8 animals/group). Significant differences ( $p < 0.05$ ) are denoted by “\*” for 0.8 ppm versus  
970 0.0 ppm, “†” for 0.4 ppm versus 0.0 ppm, and “‡” for 0.8 ppm versus 0.4 ppm for time matched  
971 groups. ACTH, adrenocorticotrophic hormone; TSH, thyroid stimulating hormone, PRL, prolactin;  
972 LH, luteinizing hormone; GH, growth hormone. Note that the data for corticosterone and  
973 epinephrine are recently published in a table form (Henriquez et al., 2021).

974 **Figure 4.** Mechanistic link between blood glucose changes and adrenal-derived stress  
975 hormones as determined using adrenalectomy (AD), and pharmacological interventions. A. Left  
976 panel shows the experimental design involving AD and treatment of rats with vehicle (VEH) or  
977  $\beta$ 2AR plus GR agonists (clenbuterol [CLEN] + dexamethasone [DEX]) 1-day prior to and the day  
978 of air or ozone exposure (Henriquez et al., 2018a). Right panel shows the treatment of healthy  
979 rats with vehicle (VEH) or  $\beta$ AR and/or GR blockers (propranolol [PROP] and mifepristone  
980 [MIFE]), respectively, followed by air or ozone exposure (Henriquez et al., 2018b). These  
981 published papers evaluated pulmonary effects of interventions. To assure effective receptor  
982 blockade the treatment began 7 days prior to air or ozone exposure. B and C. Glucose  
983 tolerance test (GTT) and the glucose data at baseline and following glucose injection in each  
984 study (n=6-8). SH, sham surgery; AD, adrenalectomy surgery; VEH, vehicle; CLEN,  
985 clenbuterol; DEX, dexamethasone; PROP, propranolol; MIFE, mifepristone; SAL, saline; CO,  
986 corn oil.

987 **Figure 5.** Changes in plasma glucose and cortisol in humans within 1-2 hour following exposure  
988 to air or 0.3 ppm ozone. (A) Archived serum samples from a clinical study were obtained where  
989 blood samples were collected pre and post exposure during two clinical visits from healthy

990 young volunteers who are exposed to air or 0.3 ppm ozone for 2 hours in a cross-over design  
991 separated for at least 2 weeks. During air or ozone exposure volunteers were intermittently  
992 exercising. B. There was no significant increase in blood glucose likely due to exercise,  
993 however, normal cortisol decreases from exercise were significantly attenuated (one way  
994 ANOVA;  $n=29$ ;  $p = 0.05$ ). Samples  $> 1.5$  *interquartile range* were removed as outliers.

995

996

997 Figure 1

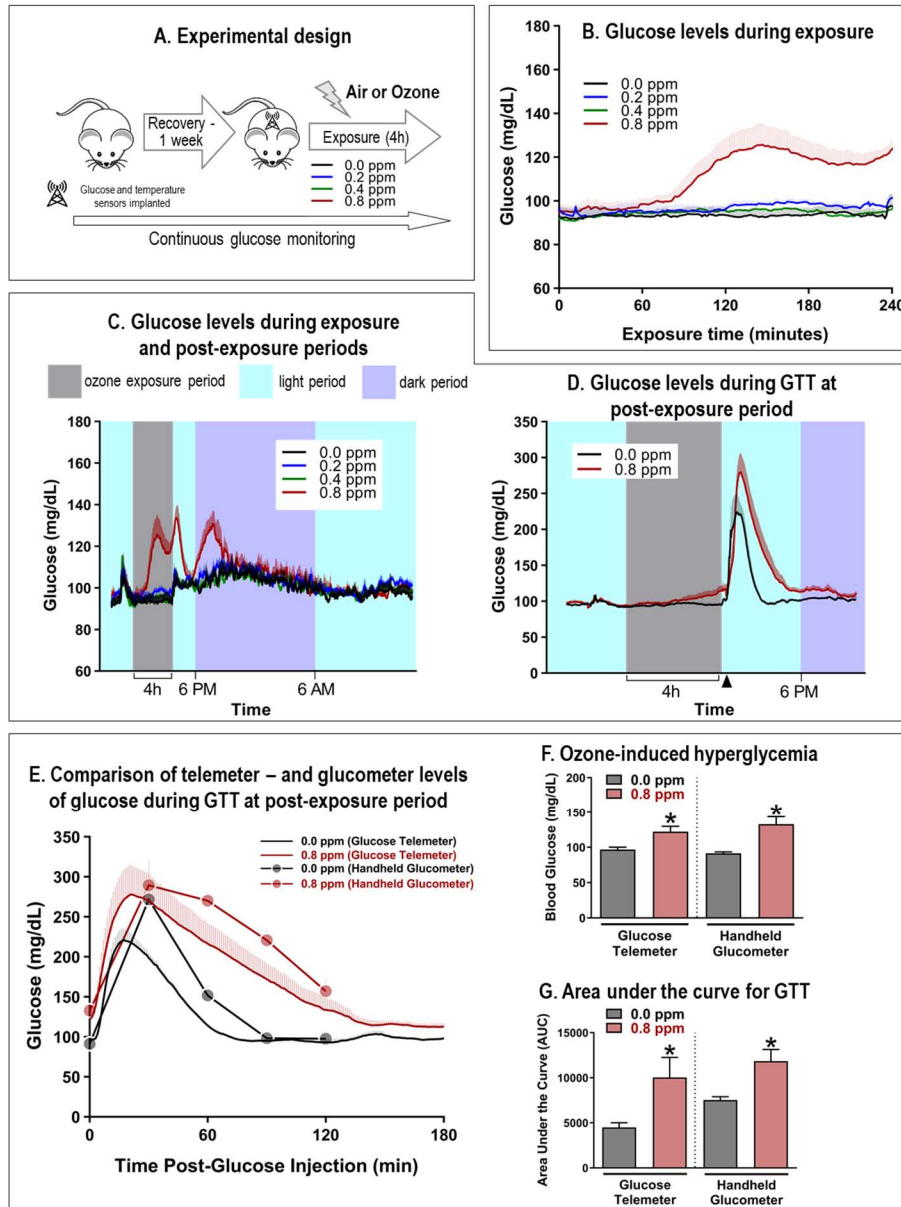

998

999

1000 Figure 2

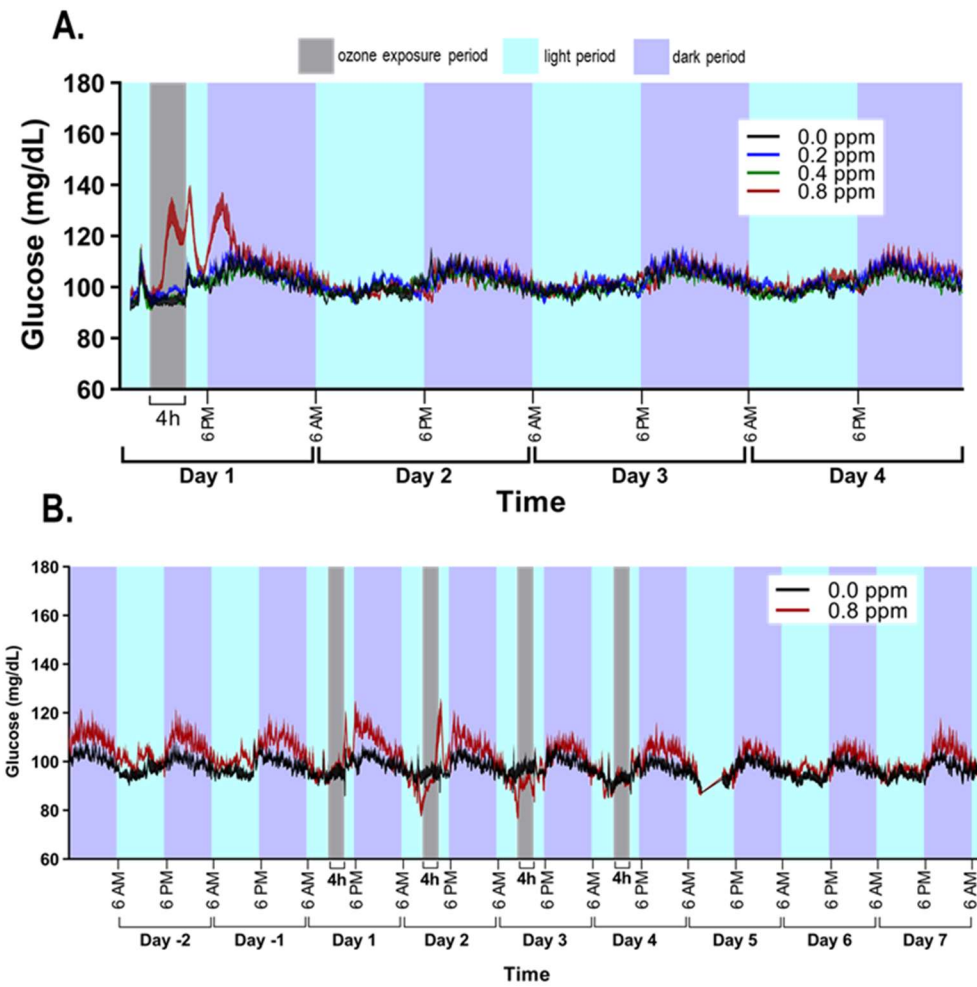

1001

1002

1003 Figure 3

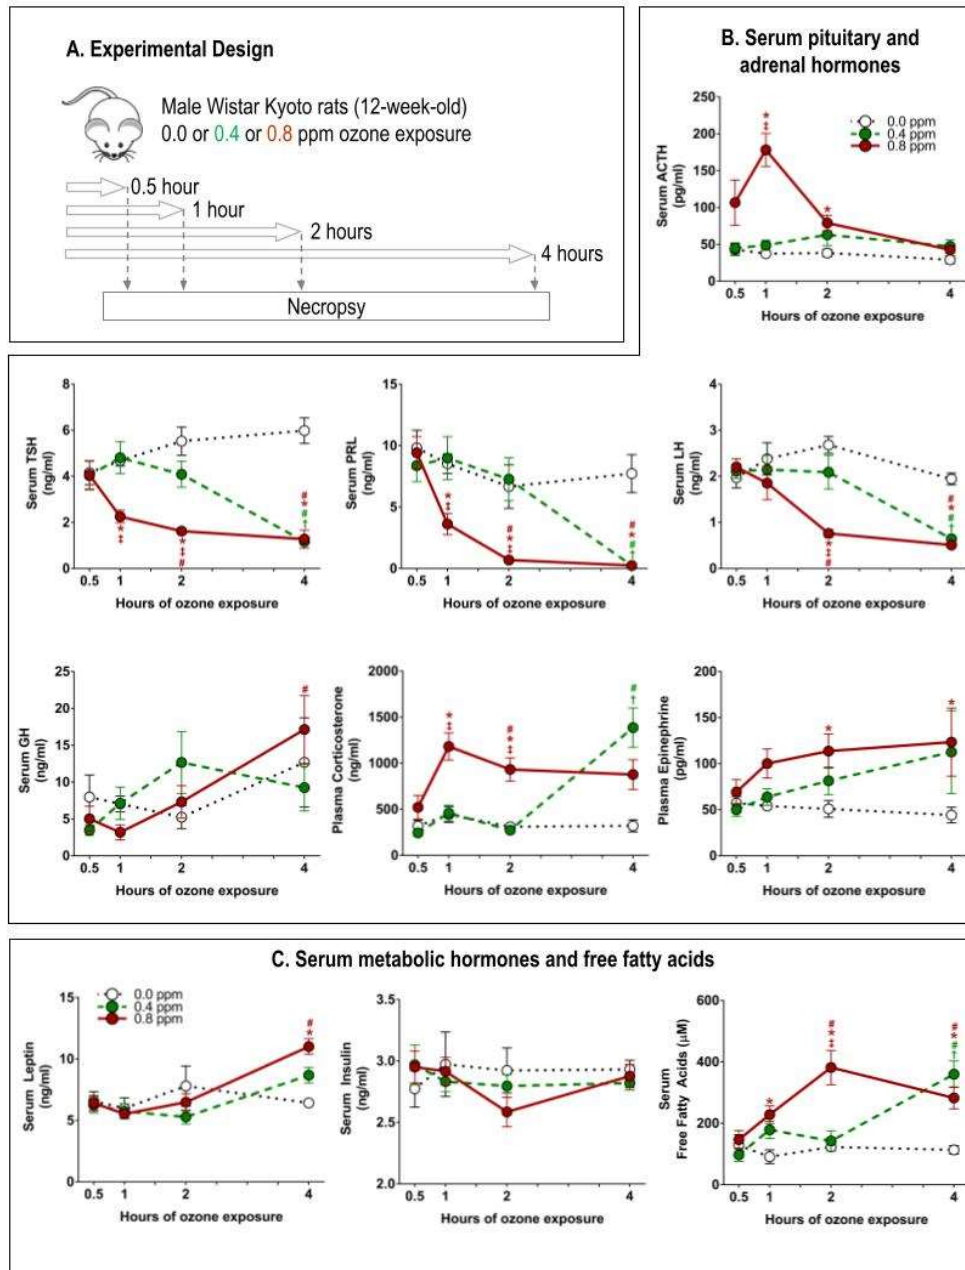

1004

1005

1006 Figure 4

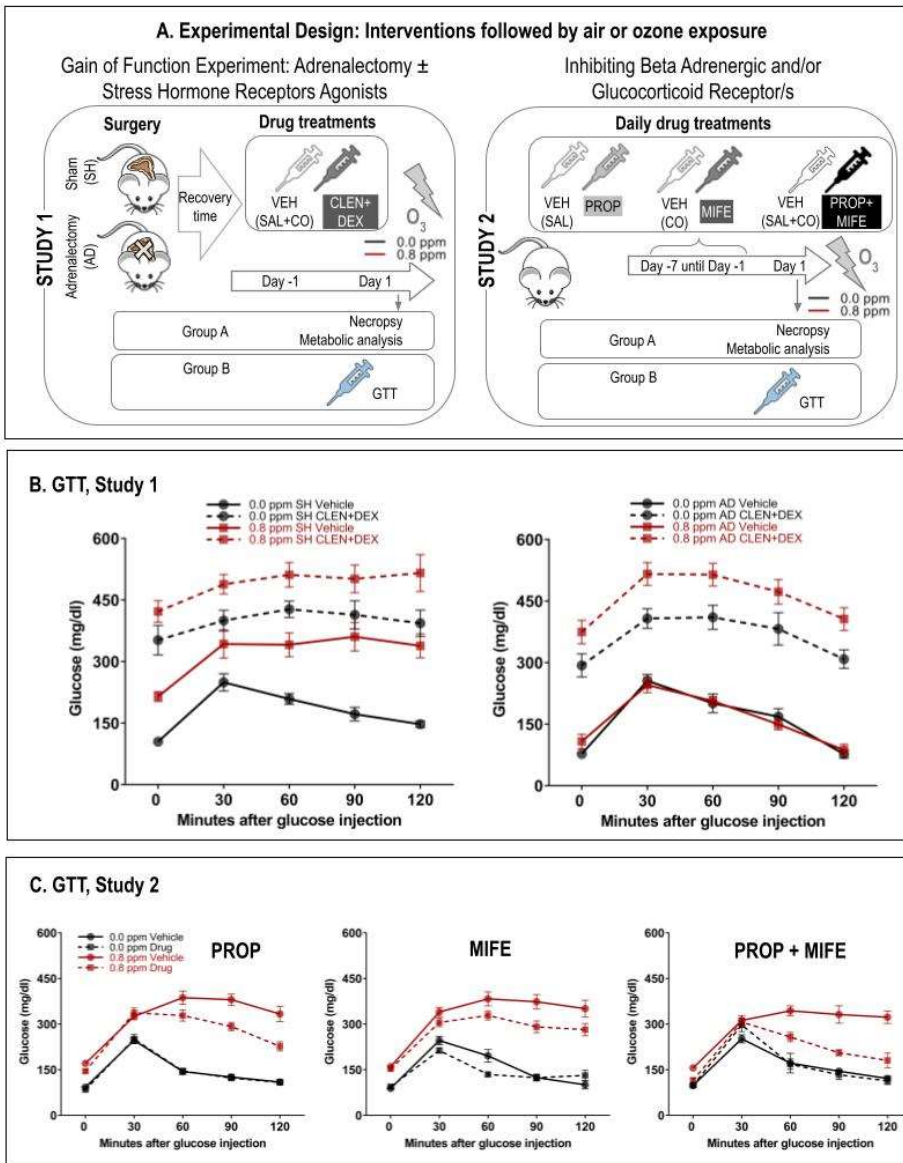

1007

1008



1009 Figure 5

A. Experimental Design

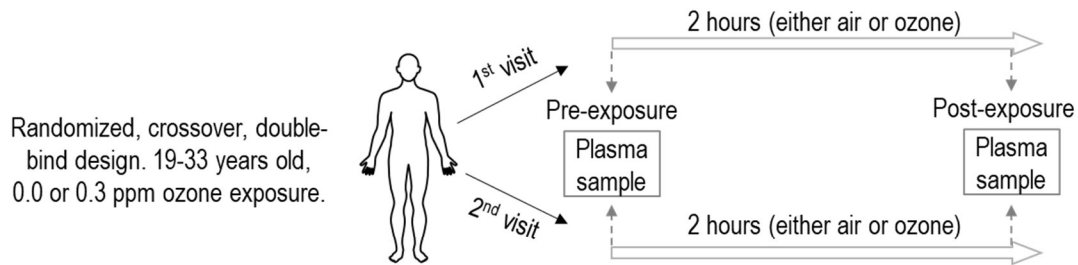

B. Pre-Post exposure change for glucose and cortisol

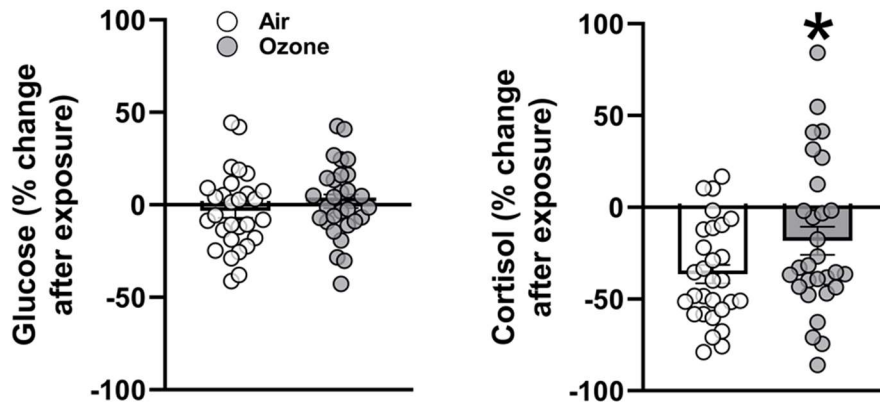

1010

1011
